# Supplementary material for: Investigation of miRNA expression profiles using cohort samples reveals potential early detectability of colorectal cancers by serum miR-26a-5p before clinical diagnosis
Source: PubMed Central journal article supplement — Oncol Lett. 2022 Jan 21;23(3):87. doi: 10.3892/ol.2022.13207 (PMC8805182; doi:10.3892/ol.2022.13207), 2022-01-21
Supplement: Supplementary_Data.pdf [file Supplementary_Data.pdf]

Figure S1. Expression levels of miR-16-5a in CRCs and normal controls. (A) Log2 75th percentile normalization: Data were normalized per array, such that the 75th percentile of the signal intensity was adjusted to 1. (B) Global normalization: Data were globally normalized per array, such that the median of the signal intensity was adjusted to 25. CRC, colorectal cancer; N, normal controls;  $P_t$ , P-value for an unpaired Student's t-test;  $P_{MW}$ , P-value for Mann-Whitney's U test; miRNA, microRNA.

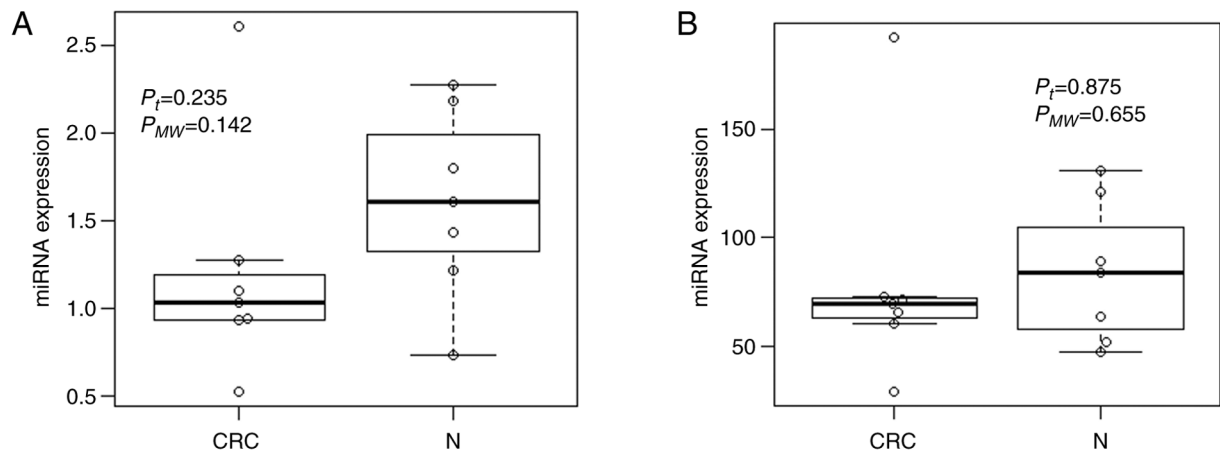

Figure S2. Expression levels of miR-26a-5p and miR-223-3p in the pre-clinical data set. Expression levels of miRNAs in (A) five advanced CRCs and five controls and (B) 12 early CRCs and 12 controls. CRC, colorectal cancer; N, normal controls;  $P_t$ , P-value for an unpaired Student's t-test;  $P_{MW}$ , P-value for Mann-Whitney's U test; miRNA, microRNA.

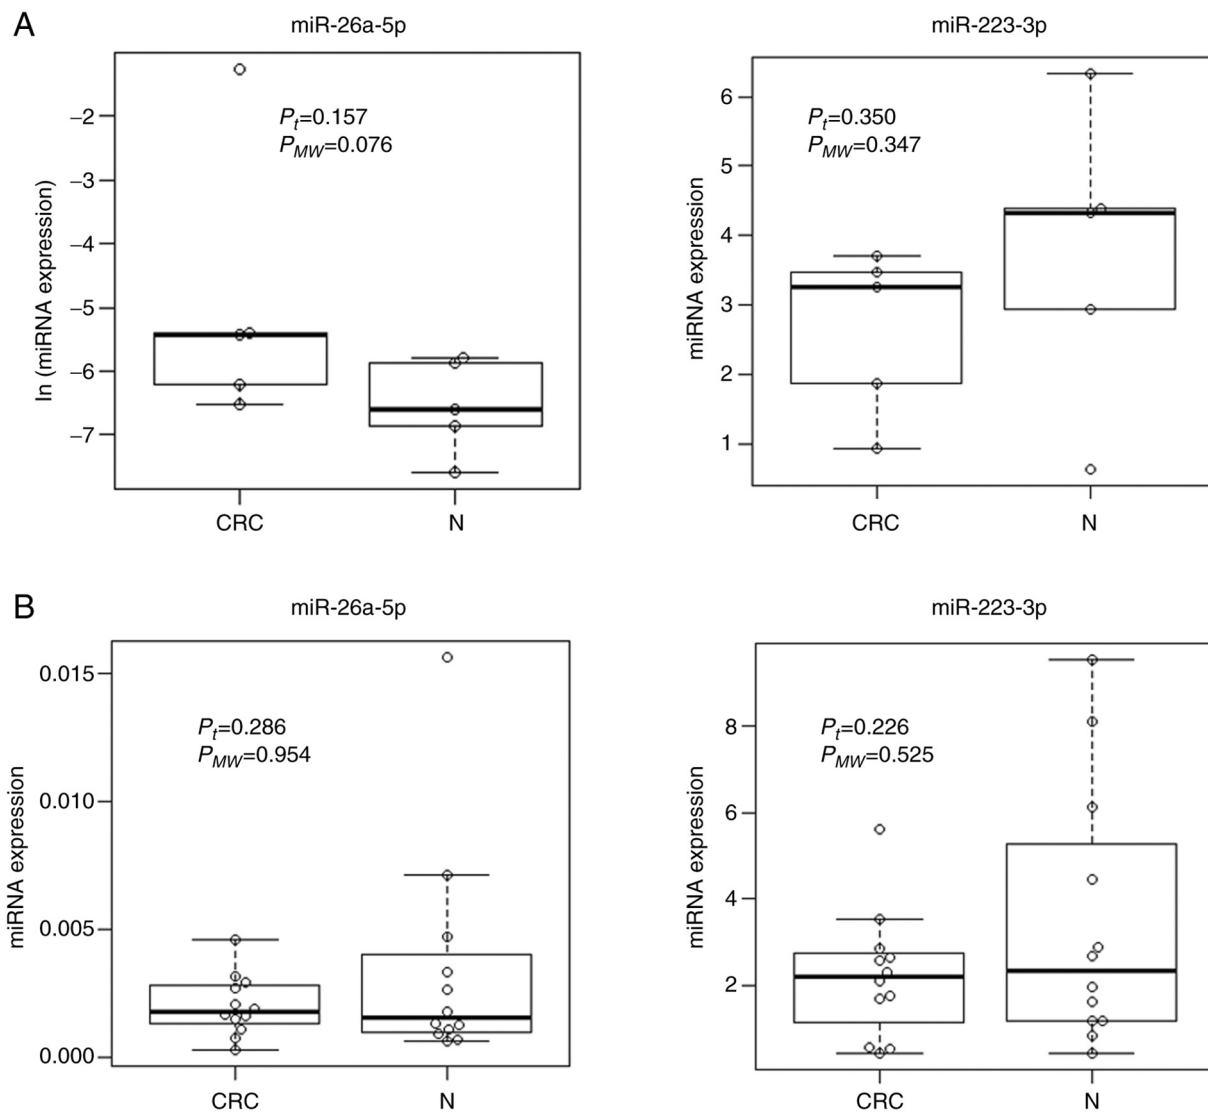

Figure S3. Early detectability of colorectal cancer before clinical diagnosis in cohort participants by ROC curves. ROC curves were generated using the pre-clinical cohort samples to detect levels of miR-26a-5p and miR-223-3p (12 early CRCs and 12 controls). CRC, colorectal cancer; advanced, advanced CRC; AUC, area under the curve; ROC curve, receiver operating characteristic curve.

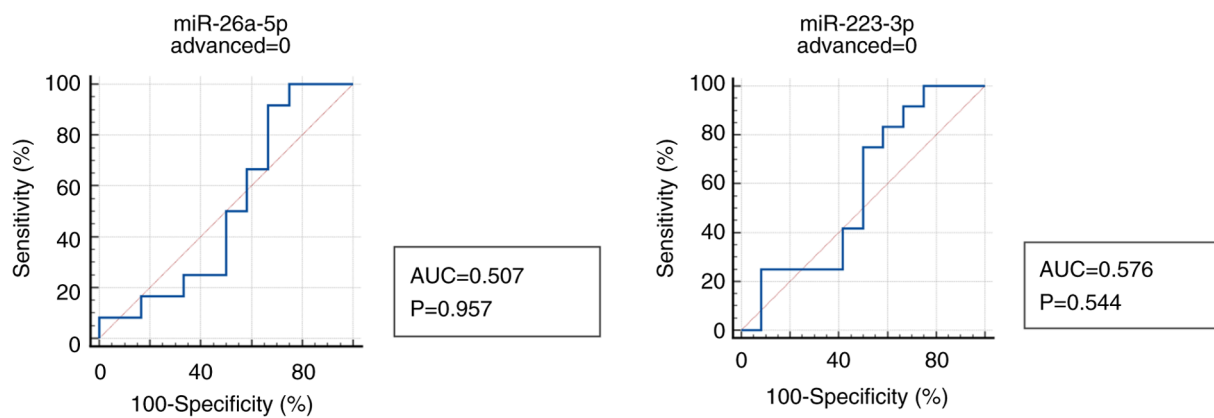

Figure S4. Expression levels of miR-26a-5p in the pre-clinical cohort samples by clinical stages. <sup>a</sup>P-value is calculated based on ANOVA. EarlyCRC, early colorectal cancer; AdvCRC, advanced colorectal cancer; N, normal controls; ANOVA, one-way analysis of variance.

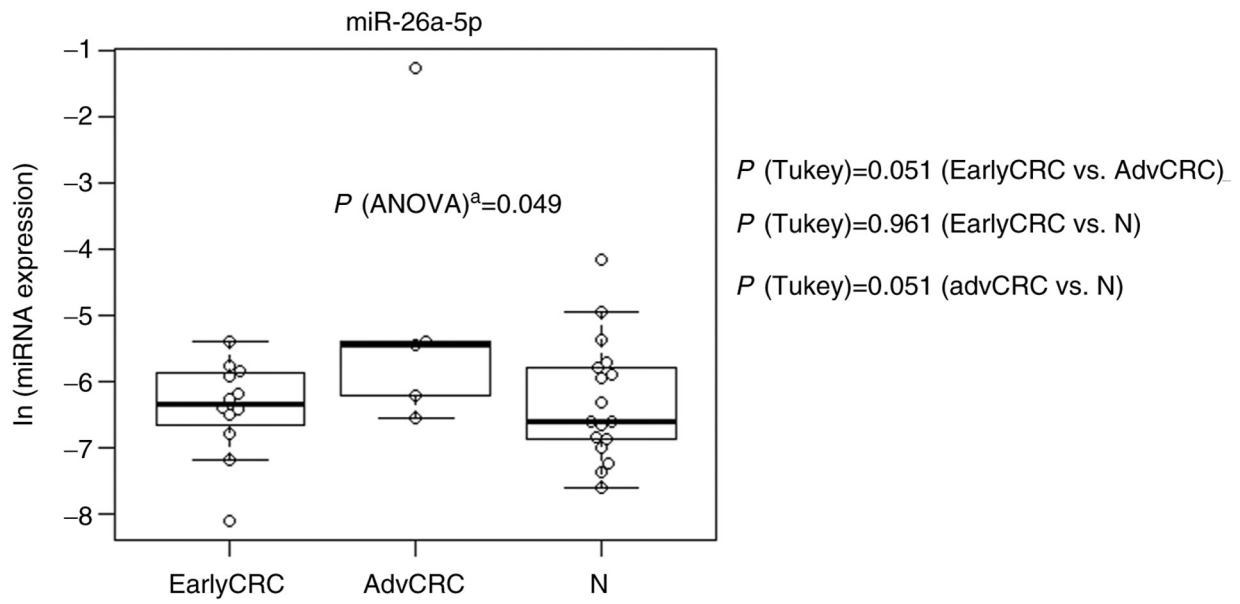

Table SI. Primers used for PCR in the validation set.

| miRNA       | iRbase ID    | miRNA sequence (5'-3') | GeneGlobe ID <sup>a</sup> |
|-------------|--------------|------------------------|---------------------------|
| miR-15a-5p  | MIMAT0000068 | UAGCAGCACAUAAUGGUUUGUG | YP00204066                |
| miR-16-5p   | MIMAT0000069 | UAGCAGCACGUAAAUAUUGGCG | YP00205702                |
| miR-21-5p   | MIMAT0000076 | UAGCUUAUCAGACUGAUGUUGA | YP00204230                |
| miR-22-5p   | MIMAT0004495 | AGUUCUUCAGUGGCAAGCUUUA | YP00204255                |
| miR-26a-5p  | MIMAT0000082 | UUCAAGUAAUCCAGGAUAGGCU | YP00206023                |
| miR-223-3p  | MIMAT0000280 | UGUCAGUUUGUCAAAUACCCCA | YP00205986                |
| miR-518e-5p | MIMAT0005450 | CUCUAGAGGGAAGCGCUUUCUG | YP00206040                |
| miR-572     | MIMAT0003237 | GUCCGCUCGGCGGUGGCCCA   | YP00204696                |
| miR-5100    | MIMAT0022259 | UUCAGAUCCCAGCGGUGCCUCU | YP02112520                |
| miR-6765-3p | MIMAT0027431 | UCACCUGGCUGGCCCGCCAG   | YP02117264                |

<sup>a</sup>ID for miRCURY LNA miRNA PCR Assay (Qiagen, Inc.). miR, microRNA.
